# Supplementary material for: Sodium Alginate Prevents Non-Alcoholic Fatty Liver Disease by Modulating the Gut–Liver Axis in High-Fat Diet-Fed Rats
Source: MDPI journal article supplement (doi:10.3390/nu14224846), 2022-11-16
Supplement: s1 [file s1]

Table S1. Primers used during the real-time PCR assay

| Gene                            | Forward/reverse primer (5'-3')                                            |
|---------------------------------|---------------------------------------------------------------------------|
| <i>TLR-4</i>                    | F: 5'- CCGCTCTGGCATCATCTTCA -3'<br>R: 5'- CCCACTCGAGGTAGGTGTTTCTG -3'     |
| <i>NF-<math>\kappa</math>B</i>  | F: 5'- GATGGGACGACACCTCTACACATA -3'<br>R: 5'- CCCAAGAGTCGTCCAGGTCA -3'    |
| <i>Caspase-1</i>                | F: 5'- ACTCGTACACGTCTTGCCCTCA -3'<br>R: 5'- CTGGGCAGGCAGCAAATTC -3'       |
| <i>NLRP3</i>                    | F: 5'- CTGAAGCATCTGCTCTGCAACC -3'<br>R: 5'- AACCAATGCGAGATCCTGACAAC -3'   |
| <i>IL-1<math>\beta</math></i>   | F: 5'- CCCTGAACTCAACTGTGAAATAGCA -3'<br>R: 5'- CCCAAGTCAAGGGCTTGGAA -3'   |
| <i><math>\beta</math>-actin</i> | F: 5'- GGAGATTACTGCCCTGGCTCCTA -3'<br>R: 5'- GACTCATCGTACTCCTGCTTGCTG -3' |

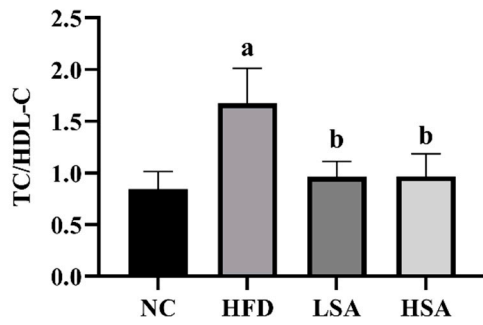

Figure S1: The ratio of TC/HDL-C.  $n = 8$  each group. <sup>a</sup> $P < 0.05$ , compared to the NC group; <sup>b</sup> $P < 0.05$ , compared to the HFD group.

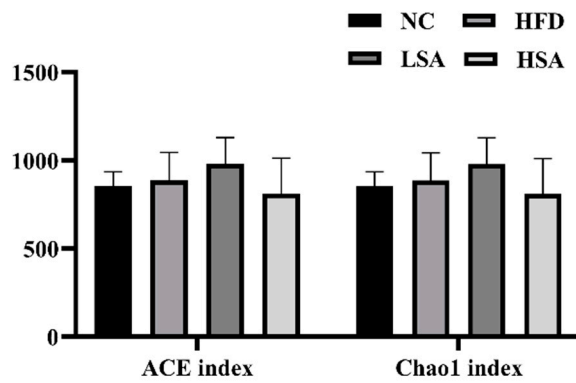

Figure S2: The alpha-diversity.  $n = 5-6$  each group. <sup>a</sup> $P < 0.05$ , compared to the NC group; <sup>b</sup> $P < 0.05$ , compared to the HFD group.

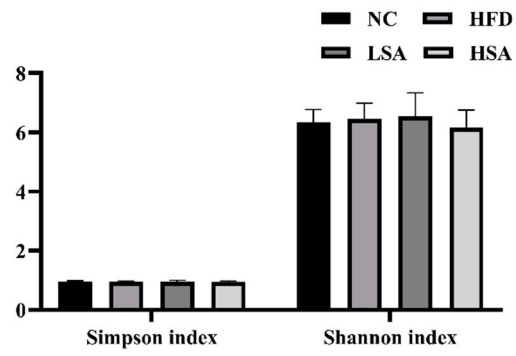

Figure S3: The alpha-diversity.  $n = 5-6$  each group. <sup>a</sup> $P < 0.05$ , compared to the NC group; <sup>b</sup> $P < 0.05$ , compared to the HFD group.
